# Supplementary material for: Impact of COVID-19 on psychological distress in subsequent stages of the pandemic: The role of received social support
Source: PubMed Central journal article supplement (PMC11423997; doi:10.1371/journal.pone.0310734), 2024-09-25
Supplement: pone.0310734.s001.pdf [file pone.0310734.s001.pdf]

**S1 Table 1. Confirmatory analysis of single factor distress scale composed of GAD-7 and PHQ-8**

|             | Wave 1<br>Est. (SE) | Wave 2<br>Est. (SE) | Wave 3<br>Est. (SE) |
|-------------|---------------------|---------------------|---------------------|
| GAD 1       | 0.806 (0.018)       | 0.786 (0.019)       | 0.813 (0.019)       |
| GAD 2       | 0.782 (0.019)       | 0.788 (0.020)       | 0.772 (0.020)       |
| GAD 3       | 0.740 (0.016)       | 0.776 (0.017)       | 0.726 (0.016)       |
| GAD 4       | 0.806 (0.016)       | 0.814 (0.016)       | 0.801 (0.016)       |
| GAD 5       | 0.751 (0.016)       | 0.728 (0.016)       | 0.707 (0.016)       |
| GAD 6       | 0.792 (0.016)       | 0.783 (0.017)       | 0.798 (0.016)       |
| GAD 7       | 0.830 (0.016)       | 0.835 (0.016)       | 0.825 (0.016)       |
| PHQ 1       | 0.701 (0.017)       | 0.735 (0.017)       | 0.705 (0.016)       |
| PHQ 2       | 0.854 (0.017)       | 0.862 (0.017)       | 0.856 (0.018)       |
| PHQ 3       | 0.705 (0.016)       | 0.699 (0.016)       | 0.702 (0.016)       |
| PHQ 4       | 0.720 (0.021)       | 0.749 (0.019)       | 0.732 (0.020)       |
| PHQ 5       | 0.713 (0.015)       | 0.717 (0.015)       | 0.713 (0.015)       |
| PHQ 6       | 0.780 (0.015)       | 0.781 (0.015)       | 0.787 (0.016)       |
| PHQ 7       | 0.776 (0.016)       | 0.808 (0.017)       | 0.777 (0.016)       |
| PHQ 8       | 0.641 (0.015)       | 0.646 (0.016)       | 0.620 (0.016)       |
| CFI         | 0.997               | 0.998               | 0.997               |
| RMSEA       | 0.035               | 0.031               | 0.033               |
| 95%CI RMSEA | [0.029, 0.042]      | [0.025, 0.038]      | [0.026, 0.039]      |
| SRMR        | 0.041               | 0.039               | 0.040               |

*Note.* Estimation was based on Diagonally Weighted Least Squares; All estimates were significant at  $p < .001$ ; GAD = Generalized Anxiety Disorder Scale; PHQ = Patient Health Questionnaire; CFI = comparative fit index; RMSEA = root mean squared error of approximation; SRMR = standardized mean squared residual.
