# Supplementary material for: Impact of COVID-19 on psychological distress in subsequent stages of the pandemic: The role of received social support
Source: PubMed Central journal article supplement (PMC11423997; doi:10.1371/journal.pone.0310734), 2024-09-25
Supplement: pone.0310734.s003.pdf [file pone.0310734.s003.pdf]

### Supplementary Table 3.

#### *Assessment of Model Overfit and Incremental Value of Predictors*

|                           | Bivariate <sup>a</sup> |         | Hierarchical <sup>b</sup> |         |
|---------------------------|------------------------|---------|---------------------------|---------|
|                           | AIC                    | ΔAIC    | AIC                       | ΔAIC    |
| Empty model               | 20192.90               |         | 20192.90                  | -       |
| Time-invariant            |                        |         |                           |         |
| Gender                    | 20166.24               | -26.66  | 20166.24                  | -26.66  |
| Age                       | 20165.89               | -27.01  | 20142.55                  | -23.69  |
| Education                 | 20196.86               | 3.96    | 20146.42                  | 3.87    |
| Marital status            | 20196.03               | 3.13    | 20150.18                  | 3.76    |
| Municipality size         | 20194.08               | 1.18    | 20153.35                  | 3.17    |
| Time-varying concurrent   |                        |         |                           |         |
| COVID-19 exposure         | 20188.08               | -4.82   | 20147.82                  | -5.53   |
| COVID-19 stressors        | 20112.47               | -80.43  | 20072.69                  | -75.13  |
| COVID-19 threats          | 20074.83               | -118.07 | 19972.15                  | -100.54 |
| Non-COVID events          | 20144.08               | -48.82  | 19929.79                  | -42.36  |
| Sense of danger due war   | 20178.88               | -14.02  | 19920.49                  | -9.30   |
| Received-quantity         | 20171.78               | -21.12  | 19915.56                  | -4.93   |
| Received-quality          | 20117.17               | -75.73  | 19803.86                  | -111.70 |
| Interaction quant X quali | 20187.86               | -5.04   | 19798.61                  | -5.25   |
| Perceived support         | 20136.57               | -56.33  | 19728.78                  | -69.83  |
| COVID-19 self-efficacy    | 19941.82               | -251.08 | 19506.54                  | -222.24 |
| Time-varying prospective  |                        |         |                           |         |
| Received-quantity         | 20192.01               | -0.89   | 19505.73                  | -0.81   |
| Received-quality          | 20185.11               | -7.79   | 19489.07                  | -16.66  |
| Interaction quant X quali | 20194.25               | 1.35    | 19491.01                  | 1.94    |
| Perceived support         | 20194.35               | 1.45    | 19486.99                  | -4.02   |
| COVID-19 self-efficacy    | 20154.28               | -38.62  | 19385.63                  | -101.36 |

*Note.* AIC = Akaike's Information Criterion.

<sup>a</sup> AIC differences of individual predictors compared to the empty model (i.e. row one).

<sup>b</sup> AIC differences of predictors were assessed incrementally after each addition of a predictor to the model (AIC differences =  $i^{\text{th}}$  row versus  $i-1^{\text{th}}$  row).
